# Supplementary material for: Single-crystal-to-single-crystal MOF encapsulation of copper azide to prepare laser-sensitive primary explosives
Source: Royal Society of Chemistry journal article supplement (doi:10.1039/d4qi02170c), 2024-01-01
Supplement: d4qi02170c1.pdf [file d4qi02170c1.pdf]

# Supporting Information

## Single-Crystal-to-Single-Crystal MOF Encapsulation of Copper Azide to Prepare Laser-sensitive Primary Explosive

Ruibing Lv,<sup>a</sup> Pengyang Pan,<sup>a</sup> Zhenghang Luo,<sup>a</sup> Ying Wang,<sup>a</sup> Quancheng Liu,<sup>b</sup> Hu Deng,<sup>\*b</sup> and Qi Zhang,<sup>\*a</sup>

<sup>a</sup> Institute of Chemical Materials (ICM), China Academy of Engineering Physics (CAEP), Mianyang 621900, P. R. China  
E-mail: jackzhang531@caep.cn

<sup>b</sup> School of Information Engineering, Southwest University of Science and Technology, Mianyang 621010, P. R. China

### Table of Contents

|                                                  |   |
|--------------------------------------------------|---|
| 1. Experimental Section .....                    | 2 |
| 2. FTIR spectroscopy .....                       | 3 |
| 3. Powder X-ray diffraction (PXRD) spectra ..... | 3 |
| 4. X-ray Crystallography .....                   | 4 |
| 5. Heats of formation calculations .....         | 7 |
| 6. Interfragment Charge Transfer (IFCT) .....    | 7 |
| 7. References .....                              | 9 |

## 1. Experimental Section

Caution! Although there was no accidental explosion during the synthesis and treatment process,  $[\text{Cu}(\text{ATRZ})_3(\text{NO}_3)_2]_n$ , ATRZ, sodium azide, and  $[\text{Cu}(\text{ATRZ})(\text{N}_3)_2]_n$  are energetic materials. Appropriate safety precautions should be taken in every research process of energetic materials. Leather coats, latex gloves, eye-protecting glasses, earplugs, and face shields are recommended for the whole experimental process. The impacts, friction and electrostatic of energetic materials must be avoided.

**Reagents and General Methods:** Acetic acid (99.5%, AR), 4-amino-1,2,4-triazole (98.0%, AR), sodium dichloroisocyanurate (96.0%), Copper nitrate trihydrate (99%, AR), and sodium azide (99%) were purchased from Shanghai Aladdin Biochemical Technology Co., Ltd. Infrared (IR) spectra were performed on the Perkin-Elmer Spectrum II IR Spectrometers using KBr pellets. The powder X-ray diffraction patterns were collected on a Bruker D8 Advance, and the  $2\theta$  range measured was  $5\text{--}50^\circ$  with steps of  $0.02^\circ/0.1\text{s}$ . The single crystal data were collected using an Oxford Diffraction Xcalibur, the structures were solved and refined with the SHELXS program in the Olex2/1.2 software suite. Thermogravimetric and differential scanning calorimetry analysis (TG-DSC) curves were recorded on a Mettler Toledo calorimeter equipped with an auto-cooling accessory at a scan rate of  $10\text{ K min}^{-1}$ . Impact and friction sensitivity data were measured using a standard BAM Fall hammer and a BAM friction tester.

**Synthesis of 4,4'-azo-1,2,4-triazole (ATRZ):** Sodium dichloroisocyanurate (20.12 g, 96 mmol) was dissolved in 200 mL of deionized water at room temperature with stirring until complete dissolution. Subsequently, 10 mL of acetic acid was added, and the mixture was vigorously stirred at room temperature for 4 hours, maintaining the reaction temperature below  $10^\circ\text{C}$  using an ice bath. Separately, 4-amino-1,2,4-triazole (10.1 g, 120 mmol) was dissolved in 10 mL of water and added to the reaction mixture. Stirring was continued for an additional 5 hours to ensure completion of the reaction. The reaction mixture was then filtered, and the solid obtained was dissolved in 300 mL of deionized water by boiling. After cooling for 3 hours, the solution was filtered again to isolate needle-shaped crystals of ATRZ. Yield: 5.12 g, 52%.

**Synthesis of  $[\text{Cu}(\text{ATRZ})_3(\text{NO}_3)_2]_n$ :** ATRZ (15 mmol, 2.5 g) was added to 200 mL of boiling deionized water and added into a 200 mL boiling aqueous solution of  $\text{Cu}(\text{NO}_3)_2 \cdot 3\text{H}_2\text{O}$  (4.5 mmol, 1.1 g). The resulting mixture was stirred for 1 hour, followed by filtration. Blue single crystals were obtained through slow evaporation filtrate over several days. Yield: 2.1 g, 70%.

**Synthesis of  $[\text{Cu}(\text{ATRZ})(\text{N}_3)_2]_n$ :** Add  $[\text{Cu}(\text{ATRZ})_3(\text{NO}_3)_2]_n$  (2 g, 3 mmol) to 120 mL of aqueous sodium azide solution ( $0.5\text{ mol L}^{-1}$ ). After 3 days, brown crystals suitable for X-ray diffraction are obtained, which are then filtered, washed, and dried to obtain final product. Yield: 0.79 g, 85%.  $T_d$  (onset)  $209^\circ\text{C}$ . IR (KBr)  $\nu = 3090(\text{w}), 2044(\text{s}), 1493(\text{m}), 1382(\text{w}), 1341(\text{w}), 1313(\text{w}), 1220(\text{w}), 1180(\text{m}), 1044(\text{m}), 880(\text{m}), 700(\text{m}), 616(\text{s}), 555(\text{m})\text{ cm}^{-1}$ . Anal. calcd for  $\text{C}_4\text{H}_4\text{CuN}_{14}$  ( $311.72\text{ g mol}^{-1}$ ): C 15.41, H 1.29, N 62.91; found: C 15.38, H 1.30, N 62.93.

## 2. FTIR spectroscopy

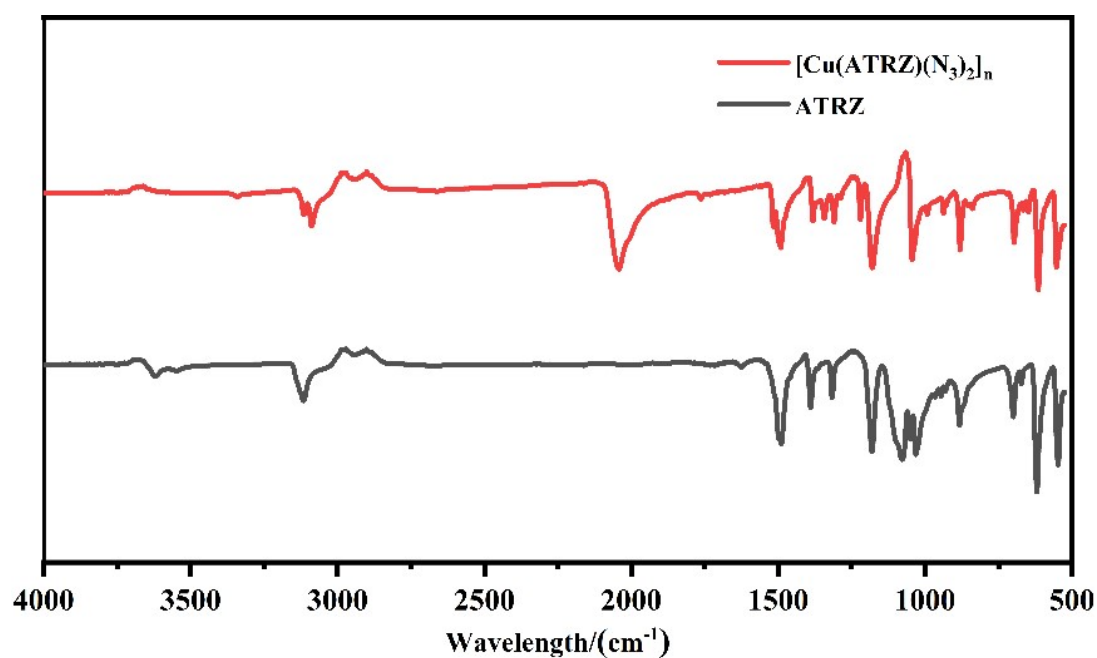

Fig. S1 IR Curves of ATRZ and [Cu(ATRZ)(N<sub>3</sub>)<sub>2</sub>]<sub>n</sub> (CA-ATRZ).

## 3. Powder X-ray diffraction (PXRD) spectra

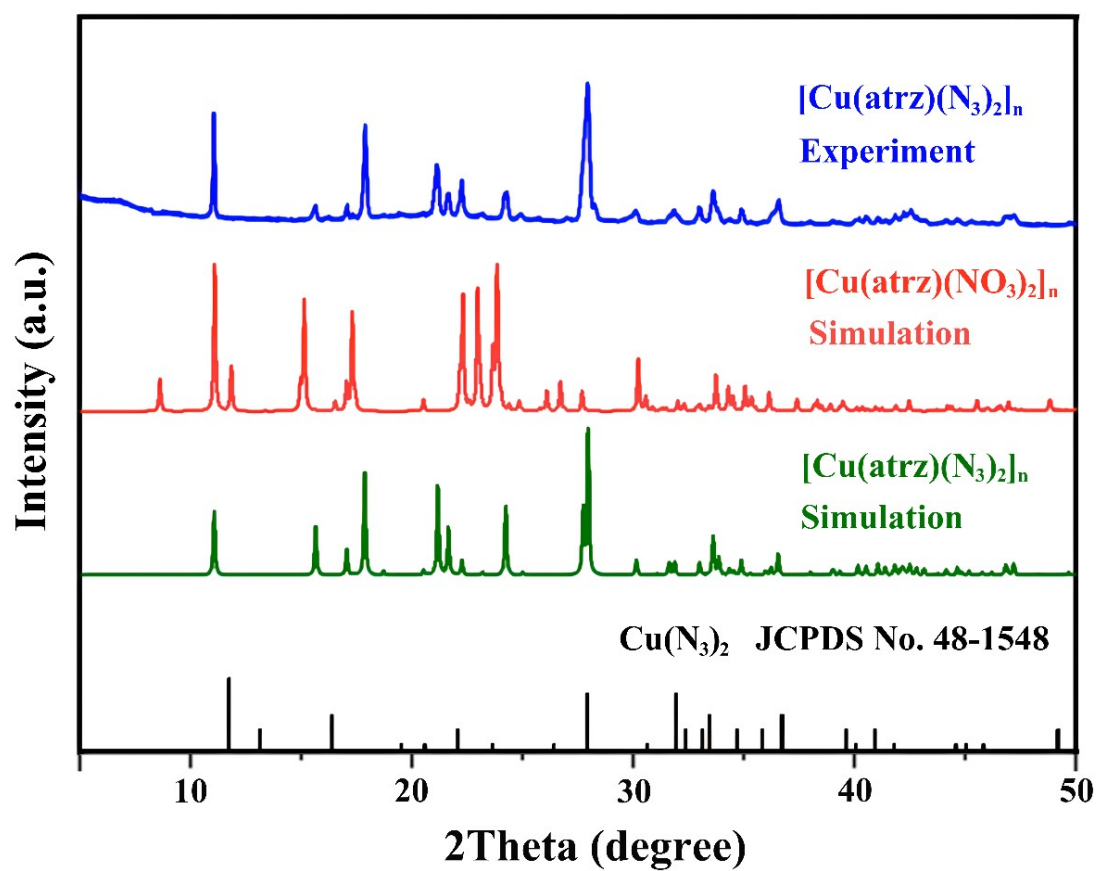

Fig. S2 PXRD spectra of CA-ATRZ, [Cu(ATRZ)<sub>3</sub>(NO<sub>3</sub>)<sub>2</sub>]<sub>n</sub>, and Cu(N<sub>3</sub>)<sub>2</sub> (CA).

#### 4. X-ray Crystallography

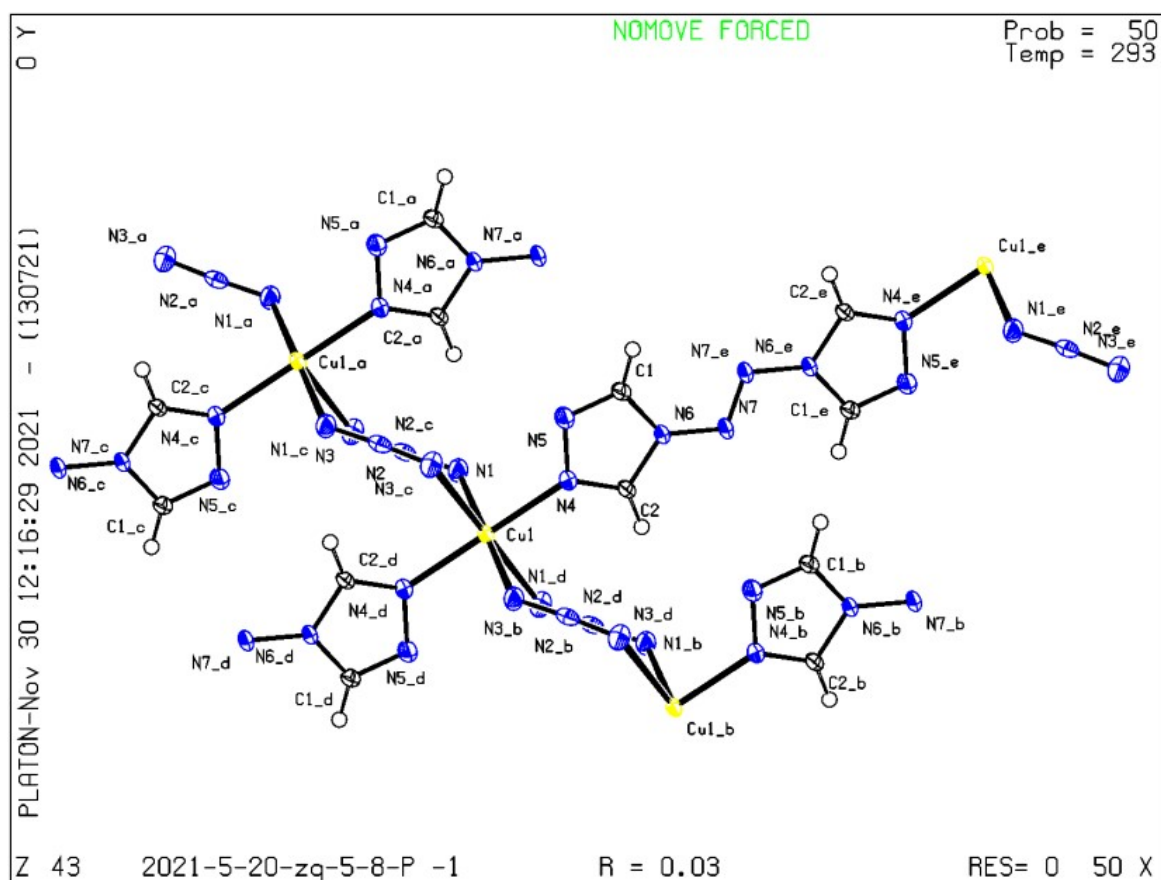

**Fig. S3** The crystal structure of  $[\text{Cu}(\text{ATRZ})(\text{N}_3)_2]_n$  (CA-ATRZ).

**Table S1.** Crystal data and structure refinement for [Cu(ATRZ)(N<sub>3</sub>)<sub>2</sub>]<sub>n</sub> (CA-ATRZ).

| Compounds                                                    | [Cu(ATRZ)(N <sub>3</sub> ) <sub>2</sub> ] <sub>n</sub> (CA-ATRZ)             |
|--------------------------------------------------------------|------------------------------------------------------------------------------|
| CCDC number                                                  | 2341002                                                                      |
| Empirical formula                                            | C <sub>4</sub> H <sub>4</sub> CuN <sub>14</sub>                              |
| Formula weight                                               | 311.75                                                                       |
| Temperature/K                                                | 293(2)                                                                       |
| Crystal system                                               | triclinic                                                                    |
| Space group                                                  | <i>P</i> -1                                                                  |
| <i>a</i> /Å                                                  | 5.2475(6)                                                                    |
| <i>b</i> /Å                                                  | 5.9713(7)                                                                    |
| <i>c</i> /Å                                                  | 8.5316(11)                                                                   |
| $\alpha$ /°                                                  | 73.990(11)                                                                   |
| $\beta$ /°                                                   | 73.570(11)                                                                   |
| $\gamma$ /°                                                  | 76.141(10)                                                                   |
| Volume/Å <sup>3</sup>                                        | 242.66(5)                                                                    |
| <i>Z</i>                                                     | 1                                                                            |
| $\rho_{\text{calc}}$ /cm <sup>3</sup>                        | 2.133                                                                        |
| $\mu$ /mm <sup>-1</sup>                                      | 2.268                                                                        |
| <i>F</i> (000)                                               | 155.0                                                                        |
| Crystal size/mm <sup>3</sup>                                 | 0.1 × 0.1 × 0.05                                                             |
| Radiation                                                    | Mo K $\alpha$ ( $\lambda$ = 0.71073)                                         |
| 2 $\theta$ range for data collection/°                       | 7.21 to 57.466                                                               |
| Index ranges                                                 | -6 ≤ <i>h</i> ≤ 6, -7 ≤ <i>k</i> ≤ 7, -11 ≤ <i>l</i> ≤ 11                    |
| Reflections collected                                        | 3401                                                                         |
| Independent reflections                                      | 1127 [ <i>R</i> <sub>int</sub> = 0.0422, <i>R</i> <sub>sigma</sub> = 0.0532] |
| Data/restraints/parameters                                   | 1127/0/88                                                                    |
| Goodness-of-fit on <i>F</i> <sup>2</sup>                     | 1.036                                                                        |
| Final <i>R</i> indexes [ <i>I</i> ≥ 2 $\sigma$ ( <i>I</i> )] | <i>R</i> <sub>1</sub> = 0.0331, <i>wR</i> <sub>2</sub> = 0.0699              |
| Final <i>R</i> indexes [all data]                            | <i>R</i> <sub>1</sub> = 0.0400, <i>wR</i> <sub>2</sub> = 0.0735              |
| Largest diff. peak/hole / e Å <sup>-3</sup>                  | 0.44/-0.35                                                                   |

**Table S2.** Selected bond lengths [Å] for [Cu(ATRZ)(N<sub>3</sub>)<sub>2</sub>]<sub>n</sub> (CA-ATRZ).

| Atom | Atom | Length/Å | Atom | Atom | Length/Å |
|------|------|----------|------|------|----------|
| Cu1  | N4   | 2.036(2) | C2   | H2   | 0.93     |
| Cu1  | N1   | 1.979(2) | N3   | Cu1  | 2.609    |
| Cu1  | N3   | 2.609    | C1   | H1   | 0.93     |
| Cu1  | N4   | 2.036(2) | N4   | N5   | 1.397(3) |
| Cu1  | N1   | 1.979(2) | N4   | C2   | 1.302(5) |
| Cu1  | N3   | 2.609    | N4   | Cu1  | 2.036    |
| N4   | N5   | 1.397(3) | N6   | N7   | 1.392(4) |
| N4   | C2   | 1.302(5) | N6   | C2   | 1.360(4) |
| N6   | N7   | 1.392(4) | N6   | C1   | 1.369(4) |

|    |    |          |    |     |          |
|----|----|----------|----|-----|----------|
| N6 | C2 | 1.360(4) | N5 | C1  | 1.301(4) |
| N6 | C1 | 1.369(4) | C2 | H2  | 0.93     |
| N2 | N1 | 1.189(4) | C1 | H1  | 0.93     |
| N2 | N3 | 1.166(4) | N2 | N1  | 1.189(4) |
| N7 | N7 | 1.233(3) | N2 | N3  | 1.166(4) |
| N5 | C1 | 1.301(4) | N1 | Cu1 | 1.979(2) |

**Table S3.** Selected bond Angles [°] for [Cu(ATRZ)(N<sub>3</sub>)<sub>2</sub>]<sub>n</sub> (CA-ATRZ).

| Atom | Atom | Atom | Angle/°  | Atom | Atom | Atom | Angle/°  |
|------|------|------|----------|------|------|------|----------|
| N4   | Cu1  | N1   | 86.9     | N4   | C2   | N6   | 108.8(2) |
| N4   | Cu1  | N3   | 88.92    | N4   | C2   | H2   | 125.6    |
| N4   | Cu1  | N4   | 180      | N6   | C2   | H2   | 125.6    |
| N4   | Cu1  | N1   | 93.1     | N2   | N3   | Cu1  | 115.8    |
| N4   | Cu1  | N3   | 91.08    | N6   | C1   | N5   | 109.7(2) |
| N1   | Cu1  | N3   | 89.91    | N6   | C1   | H1   | 125.1    |
| N1   | Cu1  | N4   | 93.1     | N5   | C1   | H1   | 125.2    |
| N1   | Cu1  | N1   | 180      | N5   | N4   | C2   | 108.5(2) |
| N1   | Cu1  | N3   | 90.09    | N5   | N4   | Cu1  | 120      |
| N3   | Cu1  | N4   | 91.08    | C2   | N4   | Cu1  | 130.8    |
| N3   | Cu1  | N1   | 90.09    | N7   | N6   | C2   | 121.6(2) |
| N3   | Cu1  | N3   | 180      | N7   | N6   | C1   | 132.0(2) |
| N4   | Cu1  | N1   | 86.9     | C2   | N6   | C1   | 106.3(2) |
| N4   | Cu1  | N3   | 88.92    | N7   | N7   | N6   | 110.2(2) |
| N1   | Cu1  | N3   | 89.91    | N4   | N5   | C1   | 106.7(2) |
| Cu1  | N4   | N5   | 120      | N4   | C2   | N6   | 108.8(2) |
| Cu1  | N4   | C2   | 130.8    | N4   | C2   | H2   | 125.6    |
| N5   | N4   | C2   | 108.5(2) | N6   | C2   | H2   | 125.6    |
| N7   | N6   | C2   | 121.6(2) | N6   | C1   | N5   | 109.7(2) |
| N7   | N6   | C1   | 132.0(2) | N6   | C1   | H1   | 125.1    |
| C2   | N6   | C1   | 106.3(2) | N5   | C1   | H1   | 125.2    |
| N1   | N2   | N3   | 176.2(3) | N1   | N2   | N3   | 176.2(3) |
| N6   | N7   | N7   | 110.2(2) | N2   | N1   | Cu1  | 127.1    |
| Cu1  | N1   | N2   | 127.1    | Cu1  | N3   | N2   | 115.8    |
| N4   | N5   | C1   | 106.7(2) | N3   | Cu1  | N1   | 89.91    |

## 5. Heats of formation calculations

The constant pressure reaction heat ( $\Delta_c U$ ) of chelate [Cu(ATRZ)(N<sub>3</sub>)<sub>2</sub>]<sub>n</sub> (CA-ATRZ) was measured by the oxygen bomb calorimeter, and the value of  $\Delta_c U$  is the average of three independent experiment results. Standard molar combustion enthalpy ( $\Delta_c H_m^\theta$ ) can be obtained from the constant pressure reaction heat ( $\Delta_c U$ ) and equation 2. The standard molar combustion enthalpy ( $\Delta_f H$ ) of chelate [Cu(ATRZ)(N<sub>3</sub>)<sub>2</sub>]<sub>n</sub> (CA-ATRZ) (1752 kJ mol<sup>-1</sup>) was obtained from  $\Delta_c H_m^\theta$  according to equation 3. (CO<sub>2</sub>(g): -393.51 kJ mol<sup>-1</sup>; H<sub>2</sub>O(l): 285.85 kJ mol<sup>-1</sup>; CuO(s): -155.2 kJ mol<sup>-1</sup>)

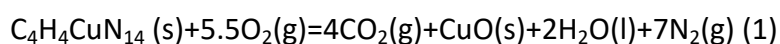

$$\Delta_c H_m^\theta = \Delta_c U + \Delta nRT \quad (2)$$

$$\Delta_f H_m^\theta = \sum \Delta_f H_m^\theta(\text{products}) - \Delta_c H_m^\theta \quad (3)$$

$\Delta n = n_g(\text{products}) - n_g(\text{reactants})$ , ( $n_g$  is the sum of the total moles of gas in the product or reactant,  $R = 8.314 \text{ J mol}^{-1} \text{ K}^{-1}$ ,  $T = 298.15 \text{ K}$ )

## 6. Interfragment Charge Transfer (IFCT)

Gaussian16 software was used to perform geometric optimization on CA-ATRZ based on B3LYP density functional and 6-311G\* basis set, and the TD-DFT method was used to calculate its excited state and obtain its electronic transition properties. Use the IFCT (interfragment charge transfer) method of the Multiwfn program to quantitatively analyze the amount of electron transfer between each fragment of the molecule in a specific excited state transition, and use the electron density difference (CDD, charge density transfer) diagram between the excited state and the ground state (Fig. 7b), showing the electron density changes of each fragment in a visual form, and finally determining the electronic transition mode. The fragment division is shown in Supplementary Fig. 4, and the calculated electron transfer values of each fragment is shown in Supplementary Table 4. Supplementary Table 5 shows the Intrinsic charge transfer (CT) and local excitation (LE) percentage during the CA-ATRZ excitation process. CT mode is further divided into metal-ligand charge transfer (MLCT, metal-ligand charge transfer), ligand-to-metal charge transfer (LMCT, ligand-metal charge transfer) and charge transfer between ligands (LLCT, ligand-ligand charge transfer), while the LE mode includes metal-centered transitions (MC, metal centered) and intra-ligand or ligand-centered transitions (LC, ligand centered).<sup>[1-3]</sup>

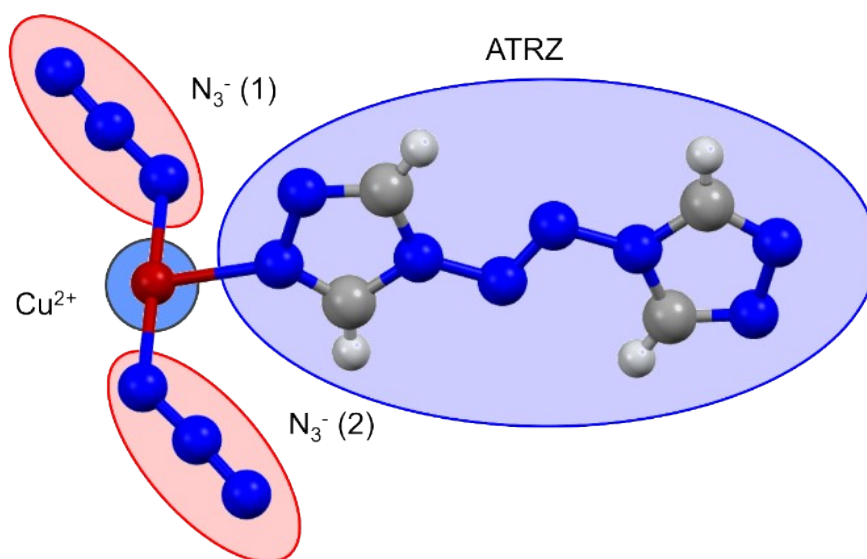

**Fig. S4** Fragments division of  $[\text{Cu}(\text{ATRZ})(\text{N}_3)_2]_n$  (CA-ATRZ).

**Table S4.** Transferred electrons between fragments.

| Donors <sup>a</sup> | Receptors <sup>b</sup> |                  |                  |          |
|---------------------|------------------------|------------------|------------------|----------|
|                     | $\text{Cu}^{2+}$       | $\text{N}_3$ (1) | $\text{N}_3$ (2) | ATRZ (1) |
| $\text{Cu}^{2+}$    | 0.10169                | 0.03276          | 0.06375          | 0.03283  |
| $\text{N}_3$ (1)    | 0.17877                | 0.05759          | 0.11207          | 0.05771  |
| $\text{N}_3$ (2)    | 0.15653                | 0.05043          | 0.09813          | 0.05053  |
| atrz (1)            | 0.00318                | 0.00102          | 0.00199          | 0.00103  |

<sup>a</sup> The Molecular fragments that provide electrons during excitation; <sup>b</sup> Molecular fragments that receive electrons during excitation; The unit for all data in the table is  $e$ .

**Table S 5.** Intrinsic charge transfer (CT) and local excitation (LE) percentage.

| CT (74.157 %) |          |          | LE (25.843 %) |         |
|---------------|----------|----------|---------------|---------|
| MLCT (e)      | LMCT (e) | LLCT (e) | MC (e)        | LC (e)  |
| 0.12934       | 0.33848  | 0.27375  | 0.10169       | 0.15675 |



## 7. References

- [1] Frisch, M. J.; Trucks, G. W.; Schlegel, H. B.; Scuseria, G. E.; Robb, M. A.; Cheeseman, J. R.; Scalmani, G.; Barone, V.; Petersson, G. A.; Nakatsuji, H.; Li, X.; Caricato, M.; Marenich, A. V.; Bloino, J.; Janesko, B. G.; Gomperts, R.; Mennucci, B.; Hratchian, H. P.; Ortiz, J. V.; Izmaylov, A. F.; Sonnenberg, J. L.; Williams-Young, D.; Ding, F.; Lipparini, F.; Egidi, F.; Goings, J.; Peng, B.; Petrone, A.; Henderson, T.; Ranasinghe, D.; Zakrzewski, V. G.; Gao, J.; Rega, N.; Zheng, G.; Liang, W.; Hada, M.; Ehara, M.; Toyota, K.; Fukuda, R.; Hasegawa, J.; Ishida, M.; Nakajima, T.; Honda, Y.; Kitao, O.; Nakai, H.; Vreven, T.; Throssell, K.; Montgomery, J. A. Jr.; Peralta, J. E.; Ogliaro, F.; Bearpark, M. J.; Heyd, J. J.; Brothers, E. N.; Kudin, K. N.; Staroverov, V. N.; Keith, T. A.; Kobayashi, R.; Normand, J.; Raghavachari, K.; Rendell, A. P.; Burant, J. C.; Iyengar, S. S.; Tomasi, J.; Cossi, M.; Millam, J. M.; Klene, M.; Adamo, C.; Cammi, R.; Ochterski, J. W.; Martin, R. L.; Morokuma, K.; Farkas, O.; Foresman, J. B.; and Fox, D. J. *Gaussian 16*, Revision A. 03, Gaussian, Inc., Wallingford CT **2016**, 3.
- [2] Lu, T.; Chen, F. Multiwfn: A Multifunctional Wavefunction Analyzer. *J. Comput. Chem.* **2012**, 33, 580–592.
- [3] Humphrey, W.; Dalke, A.; Schulten, K. VMD: Visual Molecular Dynamics. *J. Mol. Graph.* **1996**, 14, 33–38.
